# Supplementary material for: Intercropping of Rice and Water Mimosa (Neptunia oleracea Lour.): A Novel Model to Control Pests and Diseases and Improve Yield and Grain Quality while Reducing N Fertilizer Application
Source: MDPI journal article supplement (doi:10.3390/agriculture12010013), 2021-12-23
Supplement: s1 [file s1]

Archive with 1 entries (1 files):
- agriculture-1444567-supplementary.pdf
