# Supplementary material for: Intercropping of Rice and Water Mimosa (Neptunia oleracea Lour.): A Novel Model to Control Pests and Diseases and Improve Yield and Grain Quality while Reducing N Fertilizer Application
Source: MDPI journal article supplement (doi:10.3390/agriculture12010013), 2021-12-23
Supplement: s1 [file s1 › agriculture-1444567-supplementary.pdf]

## **Supplementary materials**

**Intercropping of rice and water mimosa (*Neptunia oleracea* Lour.): a novel model to control pests and diseases and improve yield and grain quality while reducing N fertilizer application**

Zewen Hei · Huimin Xiang · Jiaen Zhang · Kaiming Liang · Jiawen Zhong · Meijuan Li · Xiaoqiao Ren

**Table S1.** Incidence (%) of rice leaf blast in monocropping and intercropping treatments with the three different N fertilizer application levels.

| Season            | N fertilizer | Pattern | Day           |               |               |               |               |               |
|-------------------|--------------|---------|---------------|---------------|---------------|---------------|---------------|---------------|
|                   |              |         | 50th          | 55th          | 60th          | 65th          | 70th          | 75th          |
| 2018 late season  | ZN           | Mono    | 23.59±3.80Aa  | 27.13±1.07Aa  | 36.75±3.55Aa  | 38.80±2.23Aa  | 39.58±3.06Aa  | 40.40±2.48Aa  |
|                   |              | Inter   | 25.89±4.35Aa  | 24.14±2.33Aa  | 26.23±1.81Ba  | 28.98±2.84Ba* | 28.27±2.44Aa  | 32.68±5.20Aa  |
|                   | RN           | Mono    | 24.54±2.92Aa  | 26.57±1.30Aa  | 36.60±3.67Aa  | 38.02±4.60Aa  | 44.10±2.61Aa  | 45.43±2.27Aa  |
|                   |              | Inter   | 18.54±2.75Aa  | 22.57±1.36Ba  | 27.35±2.22Ba  | 24.74±2.09Ba* | 23.69±2.13Ba* | 34.12±0.68Ba  |
|                   | CN           | Mono    | 17.55±4.09Aa  | 22.38±1.81Aa  | 30.11±4.79Aa  | 35.05±3.80Aa* | 33.64±2.34Aa* | 38.97±2.61Aa  |
|                   |              | Inter   | 16.92±1.33Aa  | 21.75±0.91Aa  | 26.12±1.71Aa  | 24.59±1.91Ba  | 25.18±2.16Ba  | 30.81±2.43Ba  |
| 2019 early season | ZN           | Mono    | 25.97±2.91Aa  | 28.19±2.59Aa  | 34.36±0.70Aa  | 33.63±1.90Aa  | 28.28±1.70Aa  | 34.59±1.63Aa  |
|                   |              | Inter   | 20.63±2.34Aa  | 22.22±1.02Aa* | 26.75±2.17Ba* | 24.32±2.36Aa* | 25.97±2.74Aa  | 25.22±3.96Aa  |
|                   | RN           | Mono    | 27.82±1.52Aa  | 28.92±2.39Aa  | 32.99±0.97Aa  | 33.76±1.13Aa  | 28.95±0.94Aa  | 36.01±1.21Aa  |
|                   |              | Inter   | 20.55±2.23Ba  | 24.26±1.03Aa* | 23.23±1.16Ba* | 21.78±0.65Ba* | 21.63±0.91Ba  | 23.63±1.04Ba* |
|                   | CN           | Mono    | 38.33±13.45Aa | 32.98±1.38Aa* | 32.70±1.00Aa* | 31.45±1.72Aa* | 23.50±1.80Aa  | 33.32±0.50Aa* |
|                   |              | Inter   | 19.84±1.22Aa  | 23.51±1.09Ba  | 21.92±1.14Ba  | 21.11±0.84Ba  | 20.63±0.87Aa  | 21.69±1.89Ba  |

All the data presented are the means of four replicates  $\pm$  standard errors. Different capital letters indicate significant differences between cultivation patterns under the same N fertilizer level ( $P < 0.05$ ). Different small letters indicate significant differences between N fertilizer levels in the same cultivation pattern ( $P < 0.05$ ). ZN, RN and CN indicate the 0, 140 and 180 kg ha<sup>-1</sup> N fertilizer levels, respectively. “Mono” and “Inter” denote the monocropping and intercropping treatments. The “\*” represents the significant difference between monocropping with the conventional N treatments and intercropping with zero and reduced N treatments ( $P < 0.05$ ).

**Table S2.** Variance in incidence of rice leaf blast between the 2018 late season and 2019 early season.

| N<br>fertilizer | Pattern | 50th | 55th              | 60th | 65th | 70th              | 75th              |
|-----------------|---------|------|-------------------|------|------|-------------------|-------------------|
| CK              | Mono    | ns   | ns                | ns   | ns   | ns                | ns                |
|                 | Inter   | ns   | ns                | ns   | ns   | ns                | ns                |
| RN              | Mono    | ns   | ns                | ns   | ns   | V(2018) > V(2019) | V(2018) > V(2019) |
|                 | Inter   | ns   | ns                | ns   | ns   | ns                | ns                |
| CN              | Mono    | ns   | V(2018) < V(2019) | ns   | ns   | ns                | V(2018) > V(2019) |
|                 | Inter   | ns   | ns                | ns   | ns   | ns                | V(2018) > V(2019) |

V(2018) and V(2019) denote the mean value of these indexes. “>” and “<” represent the significant differences between the index in the 2018 late season and 2019 early season. “ns” indicate no significant difference. ZN, RN and CN indicate the 0, 140 and 180 kg·ha<sup>-1</sup> N fertilizer levels, respectively. “Mono” and “Inter” denote the monocropping and intercropping treatments.

**Table S3.** Incidence (%) of rice leaf folders in monocropping and intercropping treatments with the three different N fertilizer application levels.

| Season            | N fertilizer | Pattern | Day          |               |               |               |              |               |
|-------------------|--------------|---------|--------------|---------------|---------------|---------------|--------------|---------------|
|                   |              |         | 50th         | 55th          | 60th          | 65th          | 70th         | 75th          |
| 2018 late season  | ZN           | Mono    | 11.30±2.64Aa | 11.99±2.62Aa  | 19.48±3.88Aa  | 22.59±3.22Aa  | 31.90±3.72Aa | 32.80±2.63Aa  |
|                   |              | Inter   | 6.53±0.99Aa  | 11.46±0.89Aa* | 13.61±1.28Aa  | 14.58±0.87Aa* | 18.22±1.58Ba | 26.26±2.59Aa  |
|                   | RN           | Mono    | 9.15±0.89Aa  | 13.058±1.77Aa | 23.90±1.54Aa  | 24.73±3.11Aa  | 32.72±1.67Aa | 39.79±2.39Aa  |
|                   |              | Inter   | 6.54±0.60Aa  | 11.83±0.77Aa  | 14.26±1.16Ba  | 14.23±0.58Ba* | 18.79±2.09Ba | 25.96±0.87Ba  |
|                   | CN           | Mono    | 7.46±1.63Aa  | 14.22±0.42Aa* | 20.61±3.36Aa  | 25.66±0.91Aa* | 25.74±3.69Aa | 32.81±3.44Aa  |
|                   |              | Inter   | 5.84±0.32Aa  | 12.07±1.91Aa  | 14.80±1.20Aa  | 14.53±1.74Ba  | 19.07±2.41Aa | 24.19±2.50Ba  |
| 2019 early season | ZN           | Mono    | 20.57±2.67Aa | 22.65±2.57Aa  | 24.16±1.28Aa  | 31.79±2.98Aa  | 25.51±1.44Aa | 30.26±1.43Aa  |
|                   |              | Inter   | 18.54±1.97Aa | 15.60±1.11Aa* | 20.78±2.73Aa  | 20.31±2.60Aa* | 24.53±3.16Aa | 21.25±3.29Ba  |
|                   | RN           | Mono    | 22.50±1.54Aa | 22.59±2.14Aa  | 25.20±1.63Aa  | 29.82±1.47Aa  | 26.90±1.73Aa | 32.49±1.56Aa  |
|                   |              | Inter   | 16.49±1.75Ba | 16.12±1.36Aa* | 17.12±1.92Ba* | 18.62±0.81Ba* | 20.09±0.49Ba | 20.78±1.35Ba* |
|                   | CN           | Mono    | 23.64±3.72Aa | 24.95±1.00Aa* | 24.81±1.38Aa* | 26.73±1.31Aa* | 26.84±5.92Aa | 27.98±0.92Aa* |
|                   |              | Inter   | 14.65±1.31Aa | 16.53±0.88Ba  | 17.59±0.65Ba  | 15.97±0.13Ba  | 18.32±0.52Aa | 18.66±1.57Aa  |

All the data presented are the means of four replicates ± standard errors. Different capital letters indicate significant differences between cultivation patterns under the same N fertilizer level ( $P < 0.05$ ). Different small letters indicate significant differences between N fertilizer levels in the same cultivation pattern ( $P < 0.05$ ). ZN, RN and CN indicate the 0, 140 and 180 kg ha<sup>-1</sup> N fertilizer levels, respectively. “Mono” and “Inter” denote the monocropping and intercropping treatments. The “\*” represents the significant difference between monocropping with the conventional N treatments and intercropping with zero and reduced N treatments ( $P < 0.05$ ).

**Table S4.** Variance in incidence of rice leaf folders between the 2018 late season and 2019 early season.

| N fertilizer | Pattern | 50th              | 55th              | 60th | 65th              | 70th              | 75th              |
|--------------|---------|-------------------|-------------------|------|-------------------|-------------------|-------------------|
| CK           | Mono    | ns                | V(2018) < V(2019) | ns   |                   | ns                | ns                |
|              | Inter   | V(2018) < V(2019) | ns                | ns   | V(2018) < V(2019) | ns                | ns                |
| RN           | Mono    | V(2018) < V(2019) | V(2018) < V(2019) | ns   |                   | V(2018) > V(2019) | V(2018) > V(2019) |
|              | Inter   | V(2018) < V(2019) | ns                | ns   | V(2018) < V(2019) | ns                | ns                |
| CN           | Mono    | V(2018) < V(2019) | V(2018) < V(2019) | ns   | ns                | ns                | ns                |
|              | Inter   | V(2018) < V(2019) | ns                | ns   | ns                | ns                | V(2018) > V(2019) |

V(2018) and V(2019) denote the mean value of these indexes. “>” and “<” represent the significant differences between the index in the 2018 late season and 2019 early season. “ns” indicate no significant difference. ZN, RN and CN indicate the 0, 140 and 180 kg·ha<sup>-1</sup> N fertilizer levels, respectively. “Mono” and “Inter” denote the monocropping and intercropping treatments.

**Table S5.** Disease index (%) of rice sheath blight in monocropping and intercropping treatments with the three different N fertilizer application levels.

| Season            | N fertilizer | Pattern | Day           |               |               |               |              |               |
|-------------------|--------------|---------|---------------|---------------|---------------|---------------|--------------|---------------|
|                   |              |         | 50th          | 55th          | 60th          | 65th          | 70th         | 75th          |
| 2018 late season  | ZN           | Mono    | 24.00±1.22Aa  | 25.00±4.79Aa  | 33.33±4.93Aa  | 29.33±6.13Aa  | 42.22±1.13Aa | 40.67±2.00Aa  |
|                   |              | Inter   | 15.33±1.16Ba  | 19.34±2.00Aa* | 30.67±1.44Aa  | 25.67±3.54Aa  | 31.00±2.39Ba | 32.67±2.07Ba  |
|                   | RN           | Mono    | 24.00±3.03Aa  | 33.34±2.31Aa  | 38.67±3.03Aa  | 37.00±5.26Aa  | 40.33±2.52Aa | 42.67±1.44Aa  |
|                   |              | Inter   | 16.67±1.59Aa  | 22.00±1.15Ba  | 32.34±1.00Aa  | 29.00±3.05Aa  | 28.00±1.96Ba | 38.33±2.69Aa  |
|                   | CN           | Mono    | 17.33±4.25Aa  | 26.00±2.96Aa* | 32.00±5.47Aa  | 36.00±2.61Aa  | 32.00±5.42Aa | 40.00±4.71Aa  |
|                   |              | Inter   | 16.67±2.28Aa  | 21.34±3.96Aa  | 29.67±3.83Aa  | 23.67±4.85Ba  | 28.00±4.52Aa | 35.00±2.52Aa  |
| 2019 early season | ZN           | Mono    | 18.67±3.31Aa  | 30.22±1.13Aa  | 24.67±4.41Aa  | 33.33±1.44Aa  | 32.00±1.44Aa | 32.67±0.86Aa  |
|                   |              | Inter   | 11.33±2.07Aa* | 30.00±2.47Aa  | 20.89±3.19Aa  | 25.00±1.48Ba* | 29.00±1.14Aa | 27.33±0.86Ba* |
|                   | RN           | Mono    | 27.67±2.74Aa  | 31.67±1.67Aa  | 32.00±3.31Aa  | 36.00±1.96Aa  | 34.67±1.44Aa | 34.33±1.14Aa  |
|                   |              | Inter   | 17.00±2.90Aa* | 30.00±1.59Aa  | 20.67±2.70Ba* | 26.33±1.14Ba* | 29.00±1.67Aa | 26.00±0.86Ba* |
|                   | CN           | Mono    | 24.67±1.39Aa* | 31.33±0.86Aa  | 29.90±2.54Aa* | 34.67±1.22Aa* | 30.67±1.44Aa | 32.67±0.86Aa* |
|                   |              | Inter   | 14.33±1.84Ba  | 29.00±1.14Aa  | 17.33±2.88Ba  | 26.00±1.44Ba  | 27.00±1.14Aa | 27.00±1.14Ba  |

All the data presented are the means of four replicates ± standard errors. Different capital letters indicate significant differences between cultivation patterns under the same N fertilizer level ( $P < 0.05$ ). Different small letters indicate significant differences between N fertilizer levels in the same cultivation pattern ( $P < 0.05$ ). ZN, RN and CN indicate the 0, 140 and 180 kg ha<sup>-1</sup> N fertilizer levels, respectively. “Mono” and “Inter” denote the monocropping and intercropping treatments. The “\*” represents the significant difference between monocropping with the conventional N treatments and intercropping with zero and reduced N treatments ( $P < 0.05$ ).

**Table S6.** Variance in incidence of rice sheath blight between the 2018 late season and 2019 early season.

| N<br>fertilizer | Pattern | 50th | 55th              | 60th              | 65th | 70th              | 75th              |
|-----------------|---------|------|-------------------|-------------------|------|-------------------|-------------------|
| CK              | Mono    | ns   | ns                | ns                | ns   | V(2018) > V(2019) | V(2018) > V(2019) |
|                 | Inter   | ns   | V(2018) < V(2019) | ns                | ns   | ns                | ns                |
| RN              | Mono    | ns   | ns                | ns                | ns   | V(2018) > V(2019) | V(2018) > V(2019) |
|                 | Inter   | ns   | V(2018) < V(2019) | V(2018) > V(2019) | ns   | ns                | V(2018) > V(2019) |
| CN              | Mono    | ns   | ns                | ns                | ns   | ns                | ns                |
|                 | Inter   | ns   | ns                | ns                | ns   | ns                | V(2018) > V(2019) |

V(2018) and V(2019) denote the mean value of these indexes. “>” and “<” represent the significant differences between the index in the 2018 late season and 2019 early season. “ns” indicate no significant difference. ZN, RN and CN indicate the 0, 140 and 180 kg·ha<sup>-1</sup> N fertilizer levels, respectively. “Mono” and “Inter” denote the monocropping and intercropping treatments.

**Table S7.** Interaction effects between the two factors (cultivation pattern and N fertilizer) on rice yield and yield components by two-way ANOVA.

| Season            | Index                              | Pattern | N fertilizer | Pattern * N fertilizer |
|-------------------|------------------------------------|---------|--------------|------------------------|
| 2018 late season  | Yield                              | 60.17** | 16.47**      | 9.23**                 |
|                   | Per unit effective panicle numbers | 18.04** | 11.64**      | 4.98*                  |
|                   | Grain number per panicle           | 1.42    | 1.13         | 0.13                   |
|                   | Seed-setting rate                  | 0       | 0.05         | 0.43                   |
|                   | 1000-grain weight                  | 11.84   | 1.24         | 0.01                   |
| 2019 early season | Yield                              | 42.42** | 6.33**       | 4.24*                  |
|                   | Per unit effective panicle numbers | 62.97** | 4.29*        | 5.70*                  |
|                   | Grain number per panicle           | 1.06    | 0.12         | 1.01                   |
|                   | Seed-setting rate                  | 0.17    | 0.32         | 0.39                   |
|                   | 1000-grain weight                  | 0.21    | 2.06         | 0.02                   |

The cultivation pattern and N fertilizer were the two independent factors, and the F-values are presented in the table. “ \* ”  $P < 0.05$ ; “ \*\* ”  $P < 0.01$ .

**Table S8.** Variance in rice yield and yield components between the 2018 late season and 2019 early season.

| N<br>ferti<br>zer | Patte<br>rn | Rice           |              |                                  |                                |                       |                      |                      | Wate<br>r<br>mimo<br>sa |
|-------------------|-------------|----------------|--------------|----------------------------------|--------------------------------|-----------------------|----------------------|----------------------|-------------------------|
|                   |             | Per unit yield | Actual yield | Per unit<br>effective<br>panicle | Actual<br>effective<br>panicle | Grains per<br>panicle | Seed-setting<br>rate | 1000-grain<br>weight | Yield                   |
| CK                | Mon<br>o    | V(2018) <      | V(2018) <    | ns                               | ns                             | V(2018) >             | V(2018) <            | V(2018) >            | ns                      |
|                   |             | V(2019)        | V(2019)      |                                  |                                | V(2019)               | V(2019)              | V(2019)              |                         |
|                   | Inter       | V(2018) <      | V(2018) <    | V(2018) <                        | V(2018) <                      | V(2018) >             | V(2018) <            | V(2018) >            | ns                      |
|                   |             | V(2019)        | V(2019)      | V(2019)                          | V(2019)                        | V(2019)               | V(2019)              | V(2019)              |                         |
| RN                | Mon<br>o    | V(2018) <      | V(2018) <    | V(2018) <                        | V(2018) <                      | V(2018) >             | V(2018) <            | V(2018) >            | ns                      |
|                   |             | V(2019)        | V(2019)      | V(2019)                          | V(2019)                        | V(2019)               | V(2019)              | V(2019)              |                         |
|                   | Inter       | V(2018) <      | V(2018) <    | ns                               | ns                             | V(2018) >             | V(2018) <            | ns                   | ns                      |
|                   |             | V(2019)        | V(2019)      |                                  |                                | V(2019)               | V(2019)              |                      |                         |
| CN                | Mon<br>o    | V(2018) <      | V(2018) <    | ns                               | ns                             | V(2018) >             | V(2018) <            | ns                   | ns                      |
|                   |             | V(2019)        | V(2019)      |                                  |                                | V(2019)               | V(2019)              |                      |                         |
|                   | Inter       | V(2018) <      | V(2018) <    | ns                               | ns                             | ns                    | V(2018) <            | V(2018) >            | ns                      |
|                   |             | V(2019)        | V(2019)      |                                  |                                |                       | V(2019)              | V(2019)              |                         |

V(2018) and V(2019) denote the mean value of these indexes. “>” and “<” represent the significant differences between the index in the 2018 late season and 2019 early season. “ns” indicate no significant difference. ZN, RN and CN indicate the 0, 140 and 180 kg·ha<sup>-1</sup> N fertilizer levels, respectively. “Mono” and “Inter” denote the monocropping and intercropping treatments.

**Table S9.** Interaction effects between the two factors (cultivation pattern and N fertilizer) on rice grain quality determined by two-way ANOVA.

| Season            | Index             | Pattern | N fertilizer | Pattern * N fertilizer |
|-------------------|-------------------|---------|--------------|------------------------|
| 2018 late season  | Brown rice rate   | 1.10    | 2.00         | 3.13                   |
|                   | Milled rice rate  | 0.33    | 1.09         | 0.83                   |
|                   | Head rice rate    | 3.08    | 1.12         | 0.08                   |
|                   | Length/width      | 0.07    | 0.88         | 0.20                   |
|                   | Chalky rice rate  | 31.53** | 0.66         | 0.17                   |
|                   | Chalkiness degree | 14.21** | 0.67         | 3.47                   |
|                   | Amylose content   | 3.82    | 2.74         | 0.05                   |
|                   | Protein content   | 0.54    | 0.05         | 0.40                   |
|                   | Alkali value      | 0.03    | 18.03**      | 0.03                   |
|                   | Brown rice rate   | 0.72    | 4.42*        | 0.32                   |
| 2019 early season | Milled rice rate  | 0.15    | 1.09         | 1.62                   |
|                   | Head rice rate    | 0.06    | 0.60         | 0.85                   |
|                   | Length/width      | 1.06    | 7.15**       | 2.18                   |
|                   | Chalky rice rate  | 19.58** | 0.92         | 0.57                   |
|                   | Chalkiness degree | 11.97** | 1.88         | 1.87                   |
|                   | Amylose content   | 2.44    | 2.90         | 0.23                   |
|                   | Protein content   | 0.08    | 21.16**      | 0.19                   |
|                   | Alkali value      | 0.03    | 9.92**       | 1.22                   |

The cultivation pattern and N fertilizer level were the two independent factors, and the F-values are presented in the table. “\*”  $P < 0.05$ ; “\*\*”  $P < 0.01$ .

**Table S10.** Variance in rice grain quality between the 2018 late season and 2019 early season.

| N<br>fertilizer | Pattern | Brown rice<br>rate   | Milled rice<br>rate  | Head rice rate       | Length/<br>width | Chalky<br>rice<br>rate | Chalkiness<br>degree | Amylose<br>content   | Protein<br>content   | alkali               |
|-----------------|---------|----------------------|----------------------|----------------------|------------------|------------------------|----------------------|----------------------|----------------------|----------------------|
| CK              | Mono    | V(2018) <<br>V(2019) |                      | V(2018) <<br>V(2019) | ns               | ns                     | ns                   | ns                   | V(2018) <<br>V(2019) | ns                   |
|                 | Inter   | V(2018) <<br>V(2019) |                      | V(2018) <<br>V(2019) | ns               | ns                     | ns                   | ns                   | V(2018) <<br>V(2019) | ns                   |
| RN              | Mono    | V(2018) <<br>V(2019) | V(2018) <<br>V(2019) | V(2018) <<br>V(2019) | ns               | ns                     | ns                   | V(2018) <<br>V(2019) | V(2018) <<br>V(2019) | ns                   |
|                 | Inter   | V(2018) <<br>V(2019) |                      | V(2018) <<br>V(2019) | ns               | ns                     | ns                   | ns                   | V(2018) <<br>V(2019) | V(2018) <<br>V(2019) |
| CN              | Mono    |                      |                      | V(2018) <<br>V(2019) | ns               | ns                     | ns                   | V(2018) <<br>V(2019) | V(2018) <<br>V(2019) | ns                   |
|                 | Inter   | V(2018) <<br>V(2019) | V(2018) <<br>V(2019) | V(2018) <<br>V(2019) | ns               | ns                     | ns                   | ns                   | V(2018) <<br>V(2019) | ns                   |

V(2018) and V(2019) denote the mean value of these indexes. “>” and “<” represent the significant differences between the index in the 2018 late season and 2019 early season. “ns” indicate no significant difference. ZN, RN and CN indicate the 0, 140 and 180 kg·ha<sup>-1</sup> N fertilizer levels, respectively. “Mono” and “Inter” denote the monocropping and intercropping treatments.

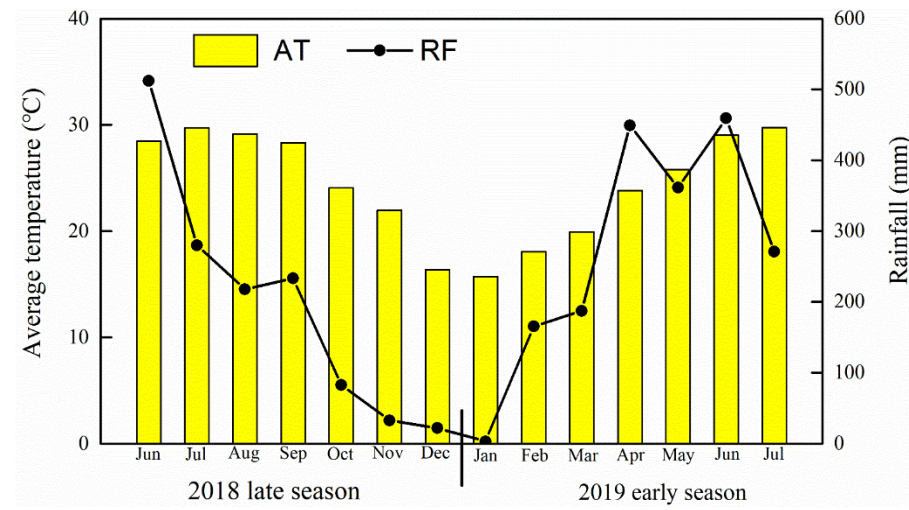

**Figure S1.** Rainfall (RF) and average temperature (AT) per month during the two seasons in Zengcheng, Guangzhou, Guangdong, China

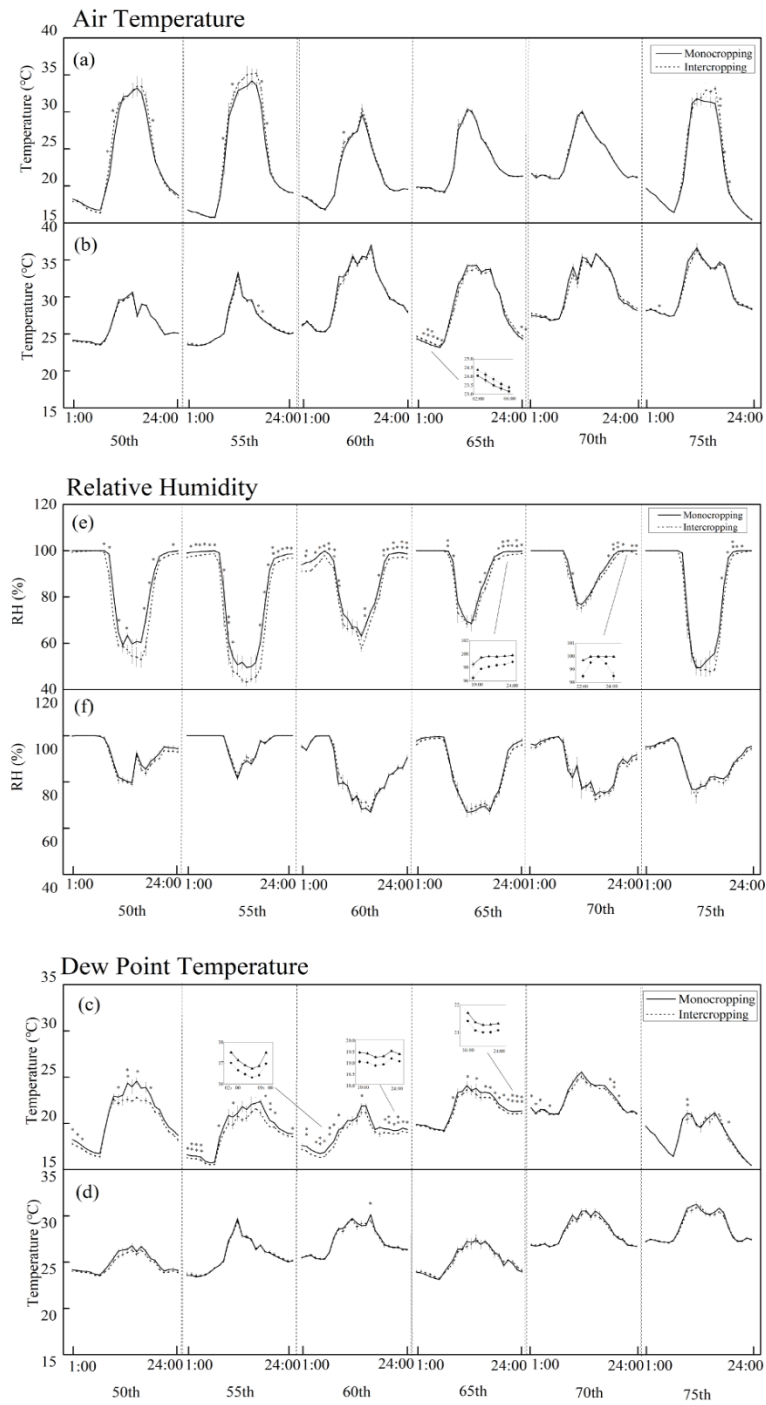

**Figure S2.** Air temperature, relative humidity (RH) and dew point temperature of rice canopy in the monocropping and intercropping under the reduced N fertilizer application level. All the data presented are the means of three replicates  $\pm$  standard errors. And the data were investigated on the 50<sup>th</sup>, 55<sup>th</sup>, 60<sup>th</sup>, 65<sup>th</sup>, 70<sup>th</sup>, and 75<sup>th</sup> days after transplanting.

(a)

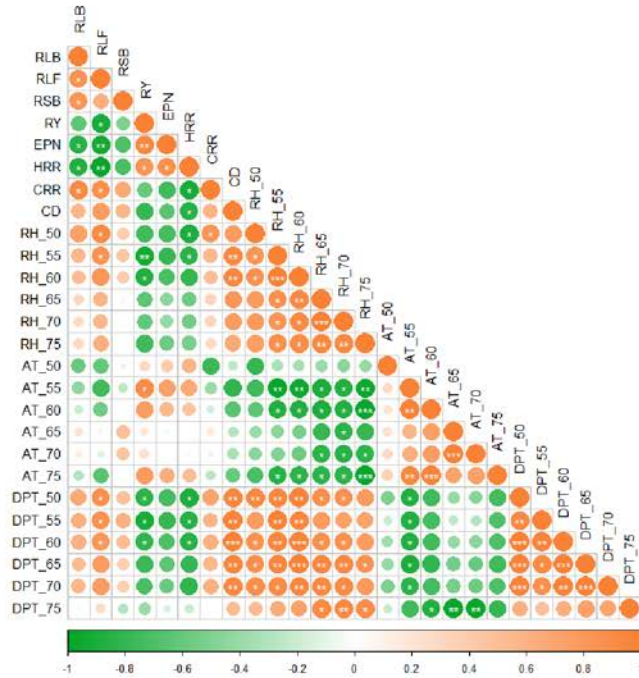

2018 late season

(b)

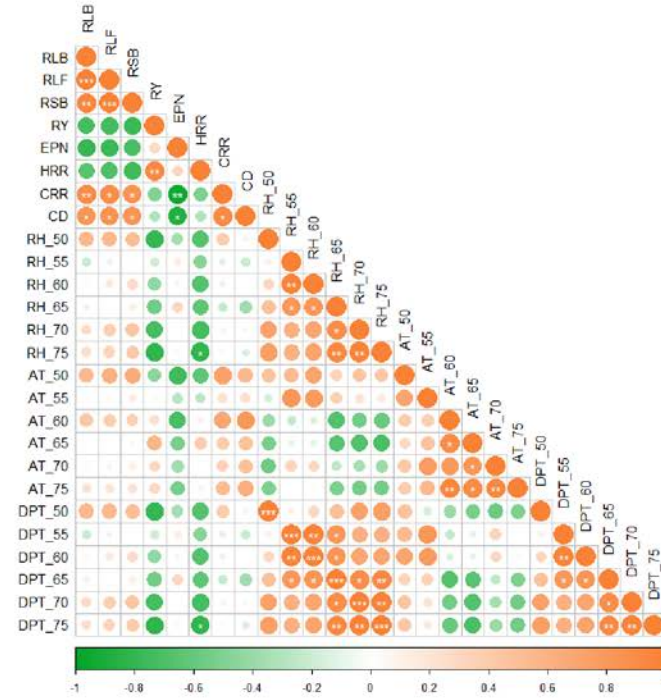

2019 early season

**Figure S3.** Pearson correlations among daily air temperature (AT), dew point temperature (DPT) and relative humidity (RH) of rice canopy at 50<sup>th</sup> ~ 75<sup>th</sup> after transplanting, rice leaf blast (RLB), rice leaf folders (RLF) and rice sheath blight (RSB) at 75<sup>th</sup> day after transplanting, rice yield (RY), per unit effective panicle number (EPN), head rice rate (HRR), chalky rice rate (CRR) and chalkiness degree (CD) at maturity stage. All the data were under the RN treatment. The “\*” represents the significant difference between indexes.
